# Supplementary material for: Carboxydotrophic growth of Geobacter sulfurreducens
Source: PubMed Central journal article supplement (PMC4703632; doi:10.1007/s00253-015-7033-z), 2015-10-19
Supplement: 253_2015_7033_MOESM1_ESM.pdf [file 253_2015_7033_MOESM1_ESM.pdf]

Supplementary Material

Applied Microbiology and Biotechnology

### **Carboxydrotrophic growth of *Geobacter sulfurreducens***

Jeanine S. Geelhoed<sup>a,b</sup>, Anne M. Henstra<sup>a,\*</sup> and Alfons J.M. Stams<sup>a</sup>

<sup>a</sup>Laboratory of Microbiology, Wageningen University, Dreijenplein 10, 6703 HB Wageningen, The Netherlands

<sup>b</sup>NIOZ Royal Netherlands Institute for Sea Research, Korrिंगaweg 7, 4401 NT Yerseke, The Netherlands

\*present address: Centre for Biomolecular Sciences, University of Nottingham, University Park, NG7 2EF, Nottingham, United Kingdom

Corresponding author:

Jeanine S. Geelhoed, NIOZ Royal Netherlands Institute for Sea Research,

Korrिंगaweg 7, 4401 NT Yerseke, The Netherlands

Phone: +31 (0)113577473

Fax: +31 (0)113573616

Email: [jeanine.geelhoed@nioz.nl](mailto:jeanine.geelhoed@nioz.nl)

**Supplementary Table S1** Specific enzyme activities of cell free extracts of cultures grown with carbon monoxide, acetate or formate as electron donor.

**Supplementary Table S2** Genomes containing gene clusters consisting of genes putatively encoding CooS-CooF-FNOR, denoted by locus tags of CooS indicated in bold. Also listed are locus tags for other CooS and CODH-ACS type anaerobic carbon monoxide dehydrogenase genes, and the presence of aerobic-type carbon monoxide dehydrogenase genes.

**Supplementary Fig S1** Phylogenetic tree of CooS subunits of *Geobacter sulfurreducens* and known CO utilizing microorganisms and of CooS subunits of organisms not reported to use CO that have gene clusters encoding CooS, CooF and FNOR.

## Supplementary Table S1

Carboxydotrophic growth of *Geobacter sulfurreducens*  
Jeanine S. Geelhoed, Anne M. Henstra and Alfons J.M. Stams

Specific enzyme activities of cell free extracts of cultures grown with carbon monoxide, acetate or formate as electron donor<sup>a</sup>. Data for Fig. 3.

| Electron donor for growth      |                                |                          | Carbon monoxide, 40 kPa in headspace                                                               |                       |                        |                        |
|--------------------------------|--------------------------------|--------------------------|----------------------------------------------------------------------------------------------------|-----------------------|------------------------|------------------------|
| Cell free extract, preparation |                                |                          | A                                                                                                  | B                     | C                      | D                      |
| Enzymatic conversion           | E-donor                        | E-acceptor               | Specific activity ( $\mu\text{mol e-donor mg protein}^{-1} \text{ min}^{-1}$ ) (avg $\pm$ std (n)) |                       |                        |                        |
| CO dehydrogenase               | CO, 100 kPa                    | BV, 2 mM                 | 0.94 $\pm$ 0.15 (3)                                                                                | 3.36 $\pm$ 0.06 (2)   | 1.63 $\pm$ 0.01 (2)    | 4.09 $\pm$ 0.34 (2)    |
| Formate dehydrogenase          | Formate, 20 mM                 | BV, 2 mM                 | 0.006 $\pm$ 0.0007 (3)                                                                             | 0.035 $\pm$ 0.008 (2) | 0.005 $\pm$ 0.0001 (2) | 0.005 $\pm$ 0.0016 (2) |
| Hydrogenase                    | H <sub>2</sub> , 100 kPa       | BV, 2 mM                 | 0.033 $\pm$ 0.003 (4)                                                                              | 0.068 $\pm$ 0.000 (2) | 0.099 $\pm$ 0.006 (3)  | 0.191 $\pm$ 0.012 (2)  |
| H <sub>2</sub> formation       | Dithionite, 25 mM<br>+MV, 5 mM | protons                  | 0.018 $\pm$ 0.0004 (3)                                                                             | n.t. <sup>b</sup>     | 0.003 $\pm$ 0.0001 (2) | 0.006 $\pm$ 0.0006 (3) |
| H <sub>2</sub> formation       | CO, 100 kPa                    | protons                  | no activity                                                                                        | n.t.                  | no activity            | no activity            |
| NADPH oxidase                  | NADPH, 5 mM                    | BV, 2 mM                 | 0.93 $\pm$ 0.06 (3)                                                                                | 1.71 $\pm$ 0.04 (2)   |                        |                        |
| NADH oxidase                   | NADH, 5 mM                     | BV, 2 mM                 | 0.29 $\pm$ 0.04 (2)                                                                                | 0.50 $\pm$ 0.001 (2)  |                        |                        |
|                                | NADH, 20 mM                    | BV, 2 mM                 | 0.34 $\pm$ 0.02 (2)                                                                                | 0.40 $\pm$ 0.04 (4)   |                        |                        |
| NADPH formation                | CO, 100 kPa                    | NADP <sup>+</sup> , 5 mM | 0.062 $\pm$ 0.004 (2)                                                                              | 0.15 $\pm$ 0.02 (2)   |                        |                        |
| NADH formation                 | CO, 100 kPa                    | NAD <sup>+</sup> , 5 mM  | 0.013 $\pm$ 0.008 (3)                                                                              | 0.005 $\pm$ 0.003 (2) |                        |                        |

<sup>a</sup> Fumarate (40 mM) as electron acceptor

<sup>b</sup> n.t. = not tested

(continued). Specific enzyme activities of cell free extracts of cultures grown with carbon monoxide, acetate or formate as electron donor<sup>a</sup>

| Electron donor for growth      |                                |                          | Acetate, 16 mM                                                                                     |                       | Formate, 40 mM <sup>c</sup> |                      |
|--------------------------------|--------------------------------|--------------------------|----------------------------------------------------------------------------------------------------|-----------------------|-----------------------------|----------------------|
| Cell free extract, preparation |                                |                          | E                                                                                                  | F                     | G                           | H                    |
| Enzymatic conversion           | E-donor                        | E-acceptor               | Specific activity ( $\mu\text{mol e-donor mg protein}^{-1} \text{ min}^{-1}$ ) (avg $\pm$ std (n)) |                       |                             |                      |
| CO dehydrogenase               | CO, 100 kPa                    | BV, 2 mM                 | 0.21 $\pm$ 0.01 (2)                                                                                | 0.076 $\pm$ 0.005 (2) | 0.30 $\pm$ 0.06 (4)         | 5.96 $\pm$ 0.21 (3)  |
| Formate dehydrogenase          | Formate, 20 mM                 | BV, 2 mM                 | 0.64 $\pm$ 0.009 (2)                                                                               | 0.40 $\pm$ 0.02 (2)   | 1.57 $\pm$ 0.17 (6)         | 1.80 $\pm$ 0.17 (3)  |
| Hydrogenase                    | H <sub>2</sub> , 100 kPa       | BV, 2 mM                 | 1.04 $\pm$ 0.09 (2)                                                                                | 0.74 $\pm$ 0.03 (2)   | 1.65 $\pm$ 0.06 (3)         | 0.53 $\pm$ 0.033 (3) |
| H <sub>2</sub> formation       | Dithionite, 25 mM<br>+MV, 5 mM | protons                  | n.t.                                                                                               | n.t.                  | 0.20 $\pm$ 0.017 (3)        | 0.24 $\pm$ 0.023 (3) |
| H <sub>2</sub> formation       | CO, 100 kPa                    | protons                  | n.t.                                                                                               | n.t.                  | n.t.                        | n.t.                 |
| NADPH oxidase                  | NADPH, 5 mM                    | BV, 2 mM                 | 1.54 $\pm$ 0.02 (2)                                                                                | 1.35 $\pm$ 0.1 (2)    |                             |                      |
| NADH oxidase                   | NADH, 5 mM                     | BV, 2 mM                 | 0.20 $\pm$ 0.01 (2)                                                                                | 0.062 $\pm$ 0.002 (2) |                             |                      |
|                                | NADH, 20 mM                    | BV, 2 mM                 | 0.31 $\pm$ 0.01 (2)                                                                                | 0.082 $\pm$ 0.004 (2) |                             |                      |
| NADPH formation                | CO, 100 kPa                    | NADP <sup>+</sup> , 5 mM | n.t.                                                                                               | n.t.                  |                             |                      |
| NADH formation                 | CO, 100 kPa                    | NAD <sup>+</sup> , 5 mM  | n.t.                                                                                               | n.t.                  |                             |                      |

<sup>a</sup> Fumarate (40 mM) as electron acceptor

<sup>b</sup> n.t. = not tested

<sup>c</sup> 0.8 mM acetate added

## Supplementary Table S2

Carboxydophilic growth of *Geobacter sulfurreducens*  
Jeanine S. Geelhoed, Anne M. Henstra and Alfons J.M. Stams

Genomes containing gene clusters consisting of genes putatively encoding CooS-CooF-FNOR, denoted by locus tags of CooS indicated in bold. Also listed are locus tags for other CooS and CODH-ACS type anaerobic carbon monoxide dehydrogenase genes, and the presence of aerobic-type carbon monoxide dehydrogenase genes.

| Species                                     | Growth with CO    | CooS                                       | CODH-ACS              | Aerobic-type CO dehydrogenase |
|---------------------------------------------|-------------------|--------------------------------------------|-----------------------|-------------------------------|
| <i>Geobacter sulfurreducens</i>             | +                 | GSU <b>2098</b>                            |                       |                               |
| <i>Geobacter daltonii</i>                   | n.r. <sup>a</sup> | Geob_0362, <b>1046</b>                     |                       |                               |
| <i>Geobacter uraniireducens</i>             | n.r.              | Gura_0618                                  |                       |                               |
| <i>Pelobacter carbinolicus</i>              | n.r.              | Pcar_0057                                  |                       |                               |
| <i>Deferrisoma camini</i>                   | n.r.              | DefcaDRAFT_3102 <sup>b</sup> , <b>3435</b> | DefcaDRAFT_2710       | 3 aerobic-type                |
| <i>Clostridium carboxidivorans</i>          | +                 | CcarbDRAFT_0341, <b>1756</b>               | CcarbDRAFT_0164, 2944 |                               |
| <i>Clostridium autoethanogenum</i>          | +                 | CAETHG_3005, 3899                          | CAETHG_1621/1620      |                               |
| <i>Clostridium ljungdahlii</i>              | +                 | CLJU_c09110, c17910                        | CLJU_c37670           |                               |
| <i>Desulfotomaculum acetoxidans</i>         | n.r.              | Dtox_2327, <b>2933</b>                     | Dtox_1270, 3780       |                               |
| <i>Desulfotomaculum gibsoniae</i>           | n.r.              | Desgi_2753, <b>3080</b>                    | Desgi_2052            | ≥6 aerobic-type               |
| <i>Caldicellulosiruptor saccharolyticus</i> | n.r.              | Csac_0400                                  |                       |                               |
| <i>Desulfobacterium autotrophicum</i>       | n.r.              | HRM2_43440                                 |                       |                               |
| <i>Desulfobacula toluolica</i>              | n.r.              | TOL2_00990, 38110                          |                       |                               |
| <i>Azotobacter vinelandii</i>               | n.r.              | Avin_04490                                 |                       |                               |
| <i>Carboxydotherrnus hydrogenoformans</i>   | +                 | CHY_0034, 0085, 0736, 1824                 | CHY_1221              |                               |
| <i>Carboxydotherrnus ferrireducens</i>      | +                 | CarfeDRAFT_00002400,<br>00009660, 00010430 | CarfeDRAFT_00014810   | 1 aerobic-type                |

<sup>a</sup>n.r.= not reported. <sup>b</sup>Grey shading indicates the presence of a gene cluster with a different order of genes putatively encoding CooS, CooF and FNOR.

## Supplementary Fig S1

Carboxydrotrophic growth of *Geobacter sulfurreducens*  
 Jeanine S. Geelhoed, Anne M. Henstra and Alfons J.M. Stams

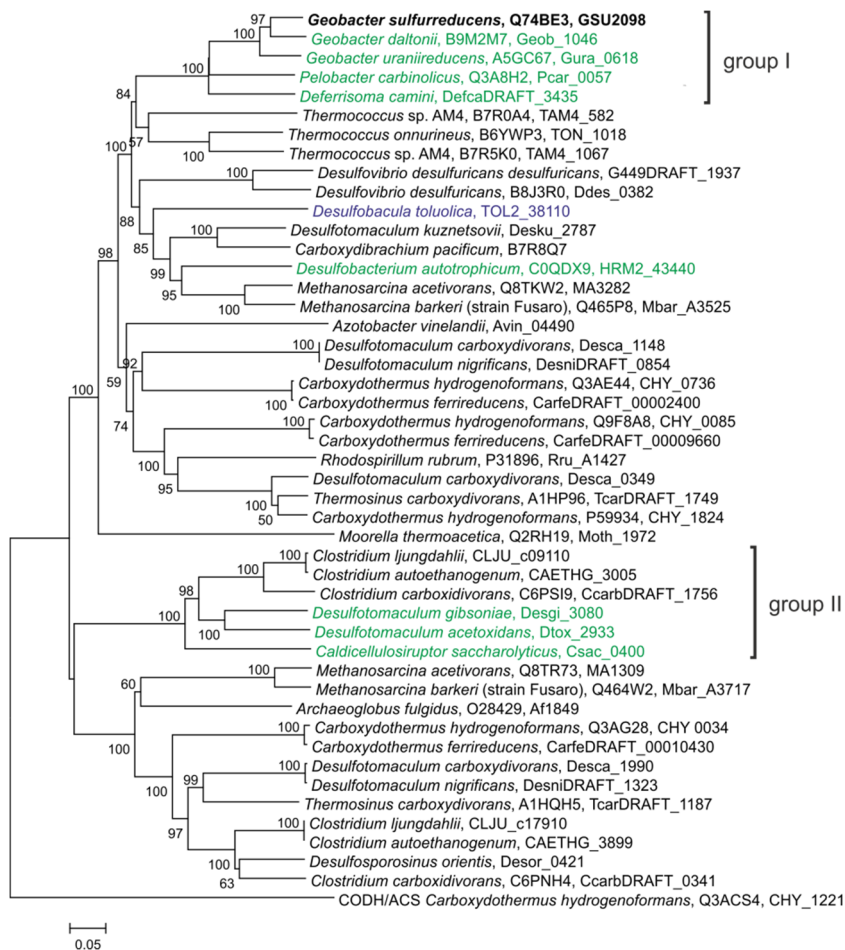

Phylogenetic tree of CooS subunits of *Geobacter sulfurreducens* (bold) and known CO utilizing microorganisms (black) and of CooS subunits of organisms not reported to use CO that have gene clusters encoding CooS, CooS and FNOR (in this order: green, see also Fig. 4, or in a different order: blue, see also Table S2). The CODH subunit of the CO dehydrogenase/acetyl-CoA synthase complex of *C. hydrogenoformans* was used as outgroup. Accession numbers in UniProt and/or Locus tags in IMG are listed. Bootstrap values  $\geq 50\%$  are indicated at the nodes. The scale bar indicates the evolutionary distance corresponding to 5 substitutions per 100 amino acids.

Phylogenetic analysis of monofunctional CODH (CooS) protein sequences showed that CooS sequences of *Geobacter/Pelobacter* sp. and *Deferrisoma camini* are placed together (Group I). The proteins in Group I are most closely related to CooS proteins of the Archaeal *Thermococcus* spp., that oxidize  $\text{CO} + \text{H}_2\text{O}$  to  $\text{H}_2$ . The deltaproteobacterial CooS proteins of the CO-oxidizing sulfate reducing bacterium *Desulfovibrio desulfuricans* are more distantly related. The CooS protein sequences of *Clostridium carboxidivorans*, *Cl. autoethanogenum* and *Cl. ljungdahlii* that are part of CooS-CooF-FNOR gene clusters grouped together with the CooS protein sequences of *Caldicellulosiruptor saccharolyticus* and *Desulfotomaculum acetoxidans* and *Dsm. gibsoniae* that are also part of such clusters (Group II). The CooS protein sequences of *Desulfobacterium autotrophicum*, *Carboxydothemus hydrogenoformans* (CHY0736), *Desulfobacula toluolica* and *Azotobacter vinelandii* are scattered over the tree and not closely related to other putative CooS proteins that can be directly linked to CooS and FNOR.
